# Supplementary material
Source: publisher figshare collection journal article supplement (https://acs.figshare.com/ndownloader/files/4144303)
Supplement: Supplementary file 1 [file 4144303]

## -Supporting Information-

# Geranyl-phenazine-diol: an Acetylcholinesterase Inhibitor Produced by a *Streptomyces* Species

*Birgit Ohlendorf, Dirk Schulz, Arlette Erhard, Kerstin Nagel and Johannes F. Imhoff\**

Kieler Wirkstoff-Zentrum (KiWiZ) at the Helmholtz-Zentrum für Ozeanforschung GEOMAR,  
Am Kiel-Kanal 44, 24106 Kiel, Germany

- S1.**  $^1\text{H}$  NMR spectrum of geranyl-phenazine-diol (**1**) in acetone- $d_6$  (500 MHz)
- S2.**  $^{13}\text{C}$  NMR spectrum of geranyl-phenazine-diol (**1**) in acetone- $d_6$  (125 MHz)
- S3.**  $^1\text{H}$ - $^1\text{H}$  COSY spectrum of geranyl-phenazine-diol (**1**) in acetone- $d_6$  (500 MHz)
- S4.**  $^1\text{H}$ - $^{13}\text{C}$  HMBC spectrum of geranyl-phenazine-diol (**1**) in acetone- $d_6$  (500 MHz)
- S5.**  $^1\text{H}$  NMR spectrum of diacetyl-geranyl-phenazine-diol (**2**) in acetone- $d_6$  (500 MHz)
- S6.** Detail of the  $^1\text{H}$ - $^1\text{H}$  NOESY spectrum of diacetyl-geranyl-phenazine-diol (**2**) in acetone- $d_6$  (500 MHz)
- S7.**  $\text{IC}_{50}$  values [ $\mu\text{M}$ ] for inhibition of acetylcholinesterase activity, growth of *B. subtilis* and fibroblast (KIF) proliferation.
- S8.** Spore chain of *Streptomyces* sp. strain LB173 (scanning electron microscopic photograph)

**S1.**  $^1\text{H}$  NMR spectrum of geranyl-phenazine-diol (**1**) in acetone- $d_6$  (500 MHz)

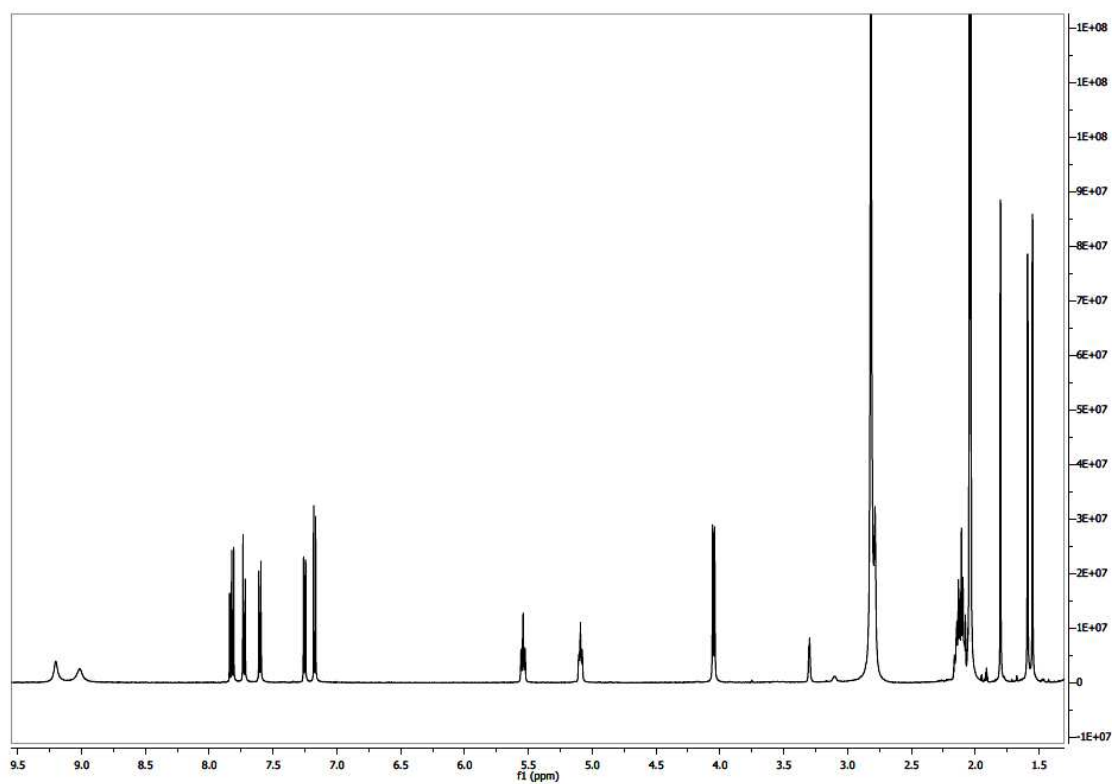

**S2.**  $^{13}\text{C}$  NMR spectrum of geranyl-phenazine-diol (**1**) in acetone- $d_6$  (125 MHz)

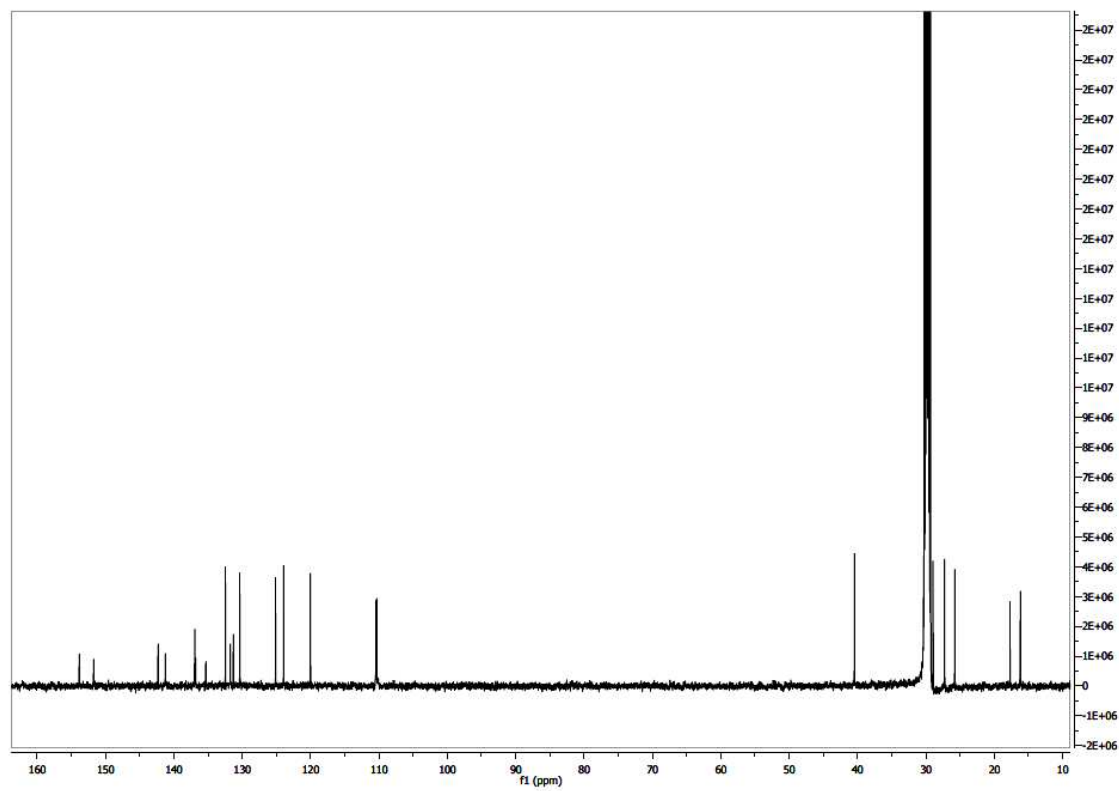

S3.  $^1\text{H}$ - $^1\text{H}$  COSY spectrum of geranyl-phenazine-diol (**1**) in acetone- $d_6$  (500 MHz)

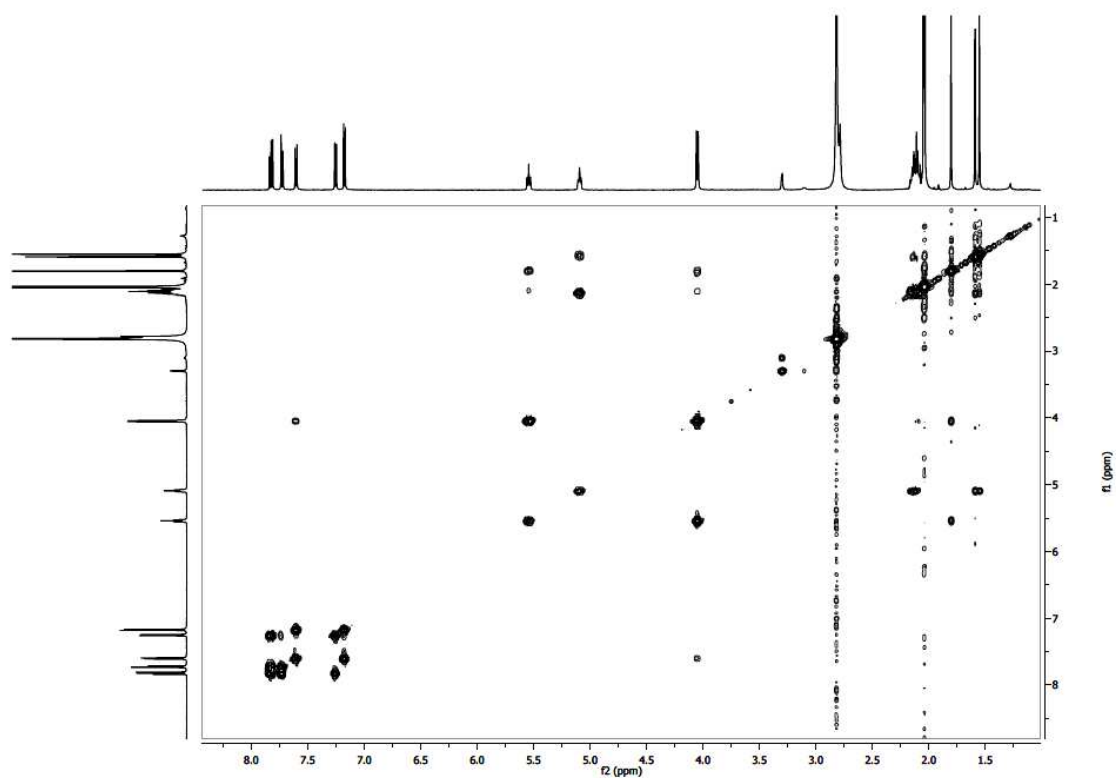

S4.  $^1\text{H}$ - $^{13}\text{C}$  HMBC spectrum of geranyl-phenazine-diol (**1**) in acetone- $d_6$  (500 MHz)

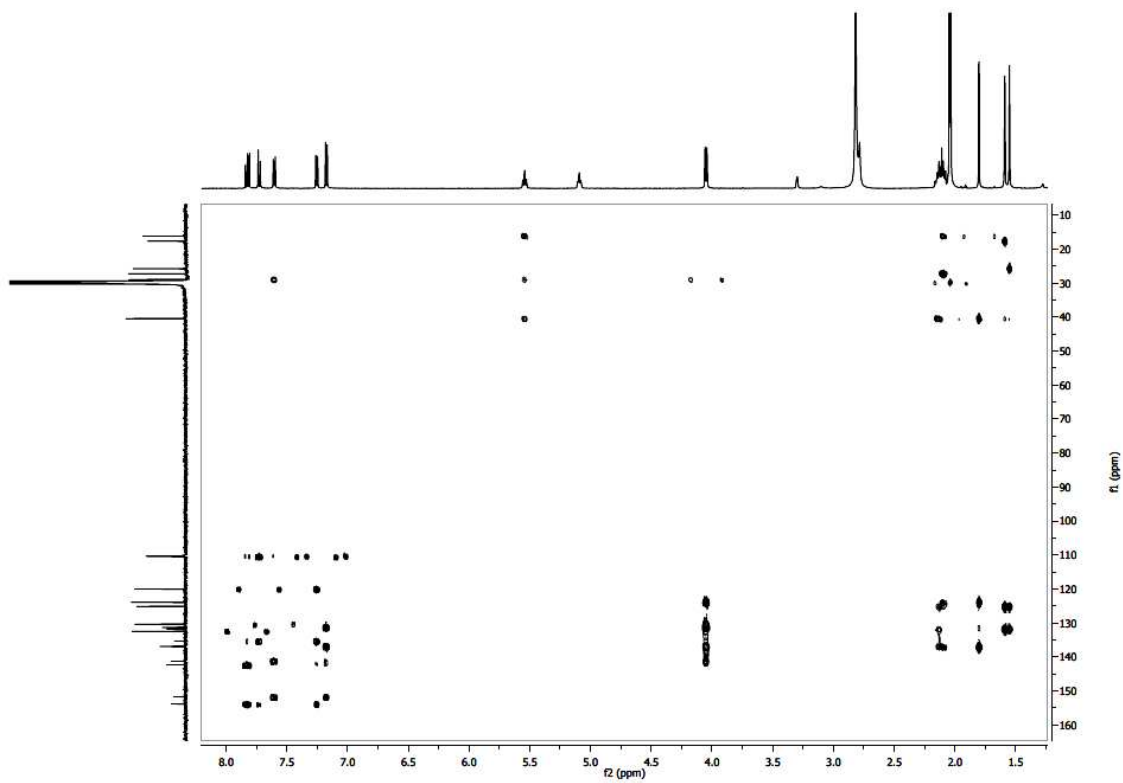

**S5.**  $^1\text{H}$  NMR spectrum of diacetyl-geranyl-phenazine-diol (**2**) in acetone- $d_6$  (500 MHz)

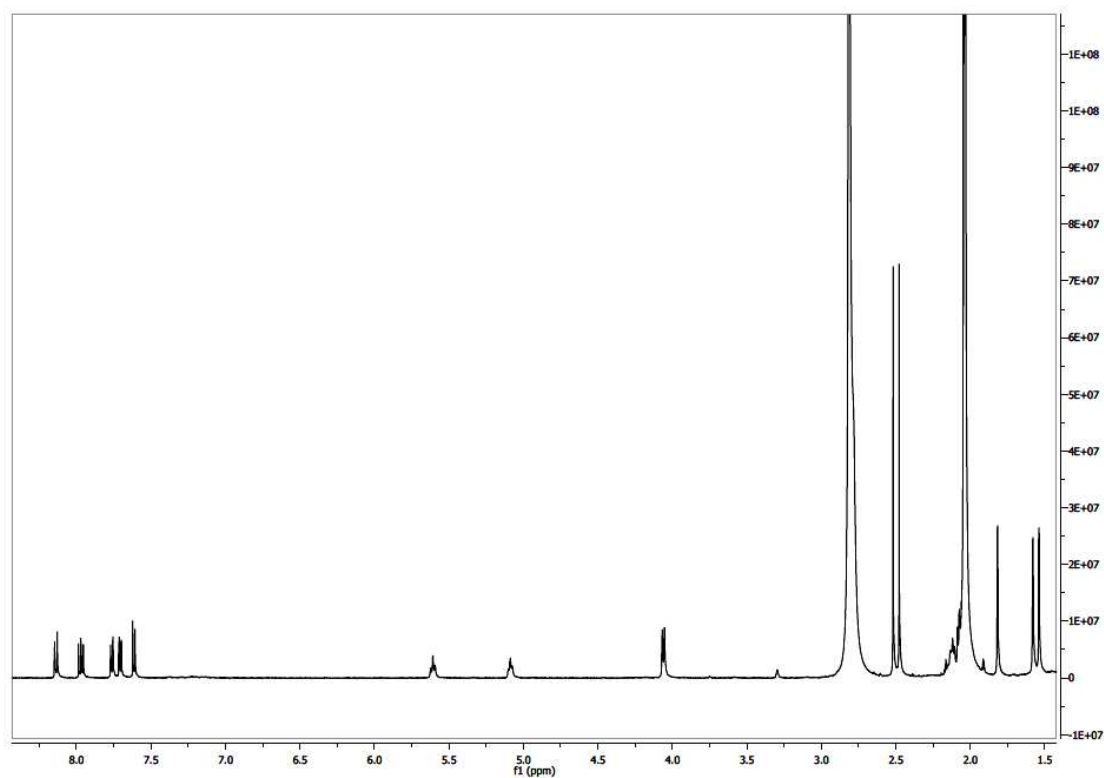

**S6.** Detail of the  $^1\text{H}$ - $^1\text{H}$  NOESY spectrum of diacetyl-geranyl-phenazine-diol (**2**) in acetone- $d_6$  (500 MHz)

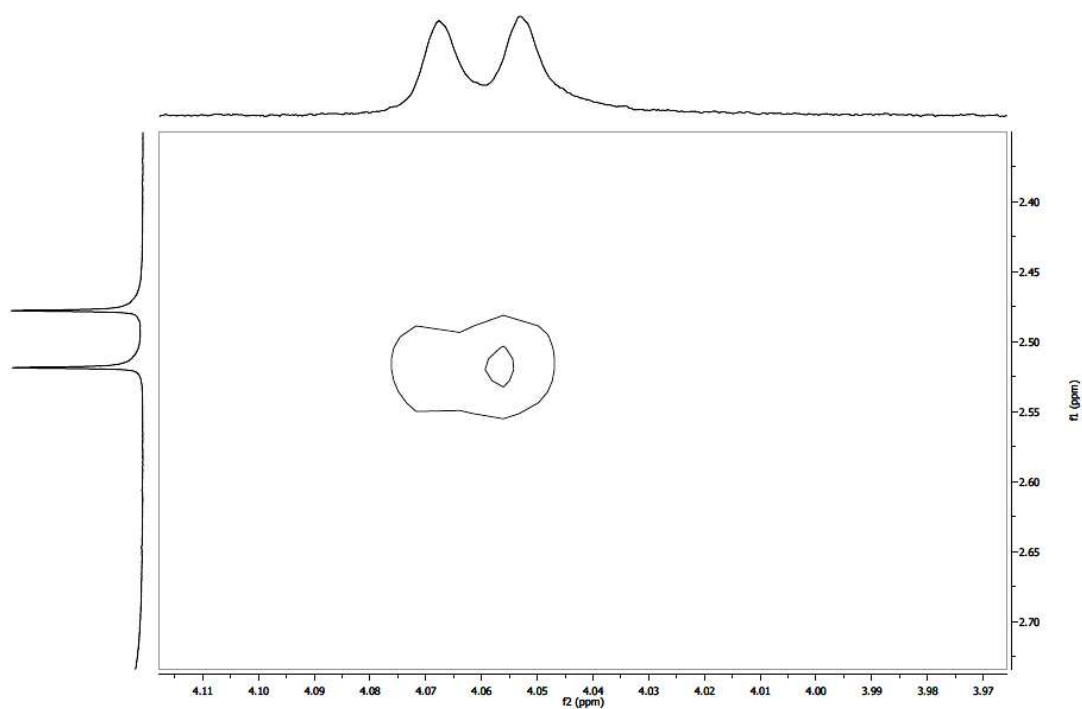

**S7.** IC<sub>50</sub> values [μM] for inhibition of acetylcholinesterase activity, growth of *B. subtilis* and fibroblast (KIF) proliferation.

|                                              | AChE                  | <i>B. subtilis</i> | KIF (fibroblasts) |
|----------------------------------------------|-----------------------|--------------------|-------------------|
|                                              | IC <sub>50</sub> [μM] |                    |                   |
| geranyl-phenazine-diol ( <b>1</b> )          | 2.62 ± 0.35           | 24 ± 3             | >50               |
| diacetyl-geranyl-phenazine-diol ( <b>2</b> ) | 2.01 ± 0.02           | 13 ± 1             | >50               |
| 1,6-phenazine-diol                           | 4.52 ± 0.46           | 22 ± 2             | >50               |
| 2-hydroxy-phenazine                          | >50                   | 75 ± 4             | >50               |
| phenazine-1-carboxylic acid                  | >50                   | >150               | >50               |
| endophenazine A                              | >50                   | 111 ± 2            | >10               |
| endophenazine B                              | >50                   | >150               | >50               |
| huperzine A                                  | 0.012 ± 0.001         | n. d.              | n. d.             |
| chloramphenicol                              | n. d.                 | 1.45 ± 0.13        | n. d.             |
| tamoxifen                                    | n. d.                 | n. d.              | 23.75 ± 0.57      |

n. d.: not determined

**S8.** Spore chain of *Streptomyces* sp. strain LB173 (scanning electron microscopic photograph)

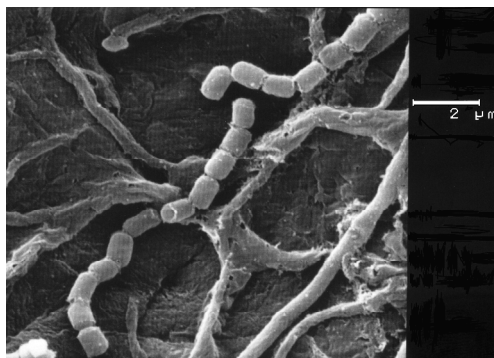

Morphological characteristics and genetic sequence information of the 16S rRNA gene designated the strain as belonging to the genus *Streptomyces*. The most closely related type strains according to the 16S rRNA gene sequence (1199bp) analysis were *Streptomyces luridiscabiei* S63<sup>T</sup> (GenBank/ EMBL/ DDBJ acc. No. AF361784) and *Streptomyces flavogriseus* strain CBS 101.34<sup>T</sup> (GenBank/ EMBL/ DDBJ acc. No. AJ494864), both with a sequence similarity of 99.5 %. As can be seen on the scanning electron microscopic picture DB620 produces cylindrical spores with a smooth surface, which fits well to the description of the spores of *Streptomyces luridiscabiei* S63<sup>T</sup>.
